# Supplementary material for: miR-27a Targeting PIK3R3 Regulates the Proliferation and Apoptosis of Sheep Hair Follicle Stem Cells
Source: MDPI journal article supplement (doi:10.3390/ani13010141), 2022-12-29
Supplement: s1 [file s1]

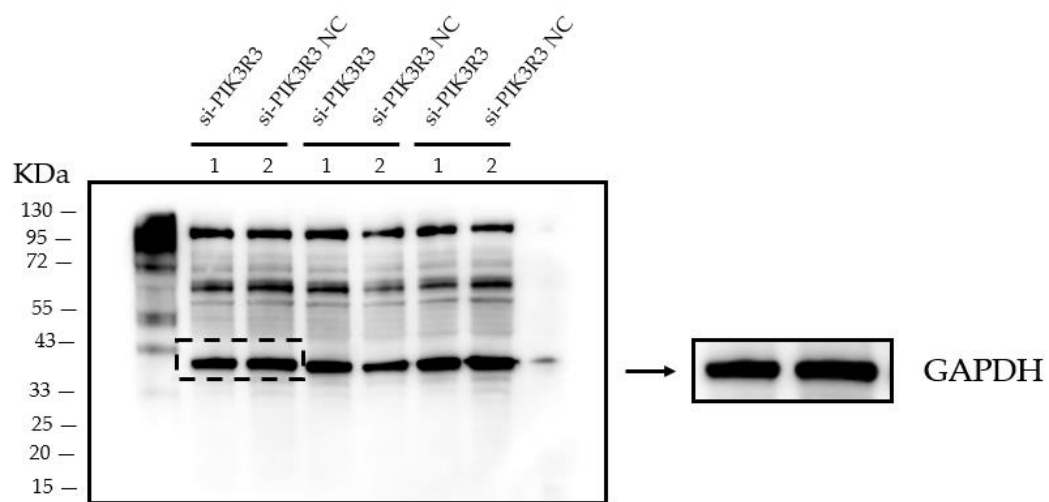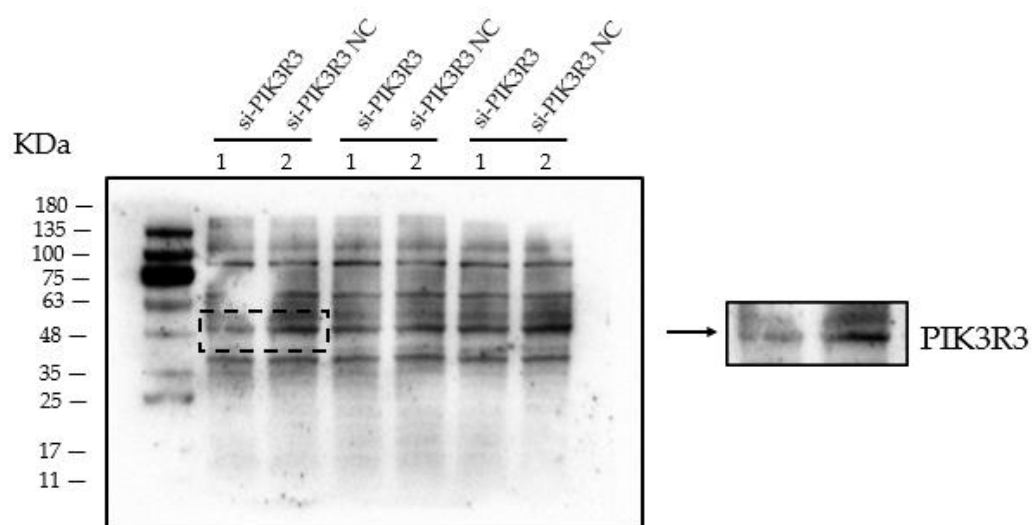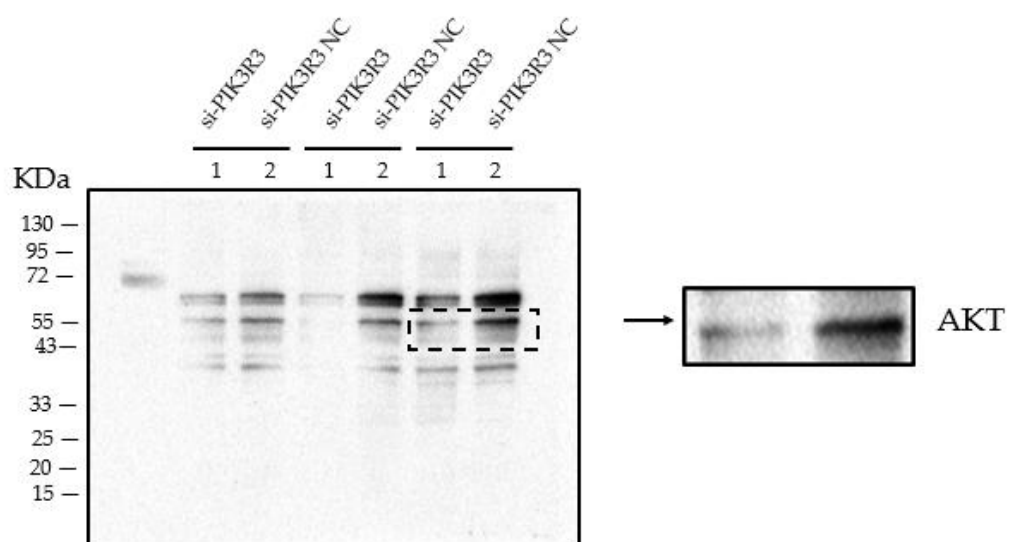

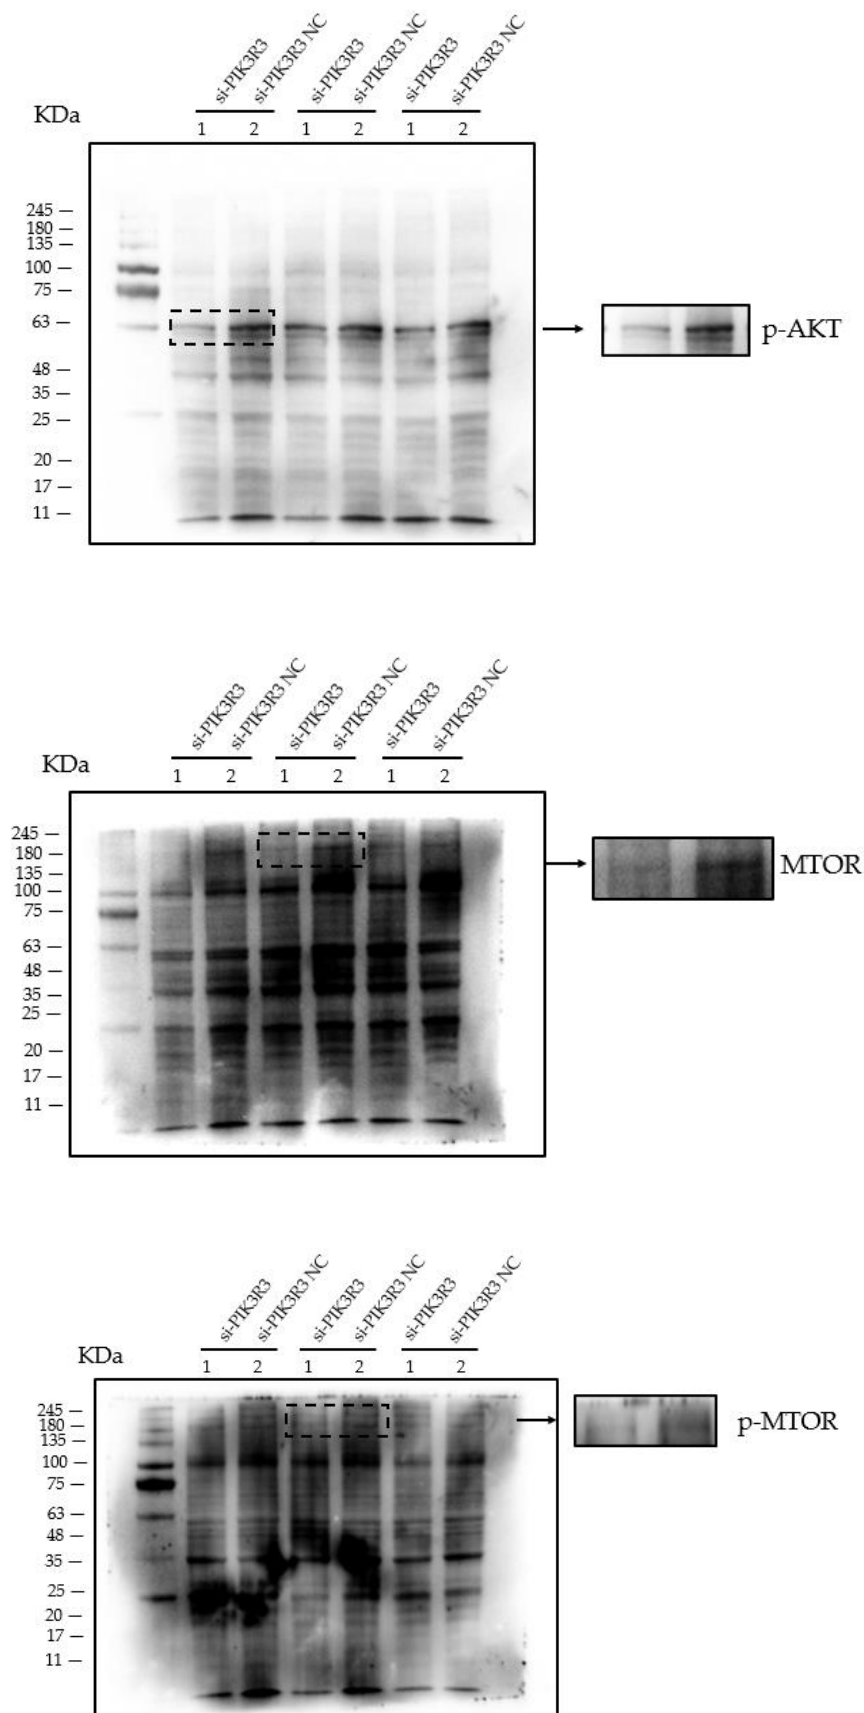

**Figure S1.** Expression changes of GAPDH, PIK3R3, AKT, p-AKT, MTOR and p-MTOR

proteins with si-PIK3R3 or a negative control (NC) construct in HFSCs.

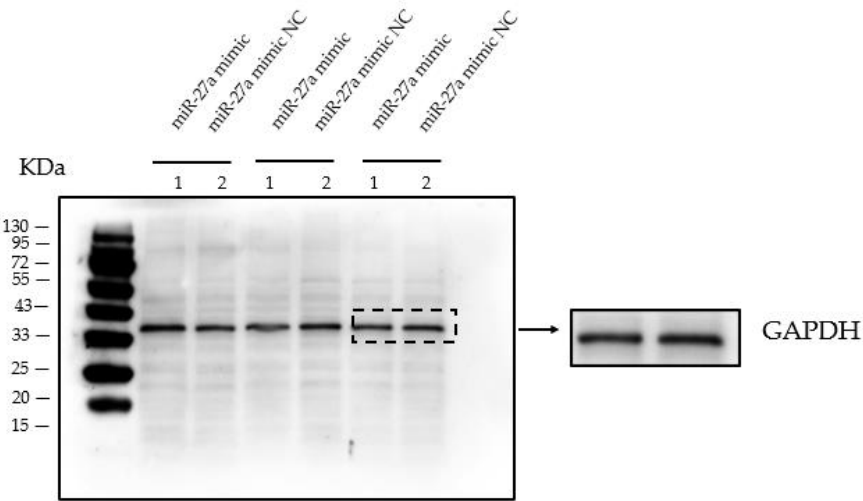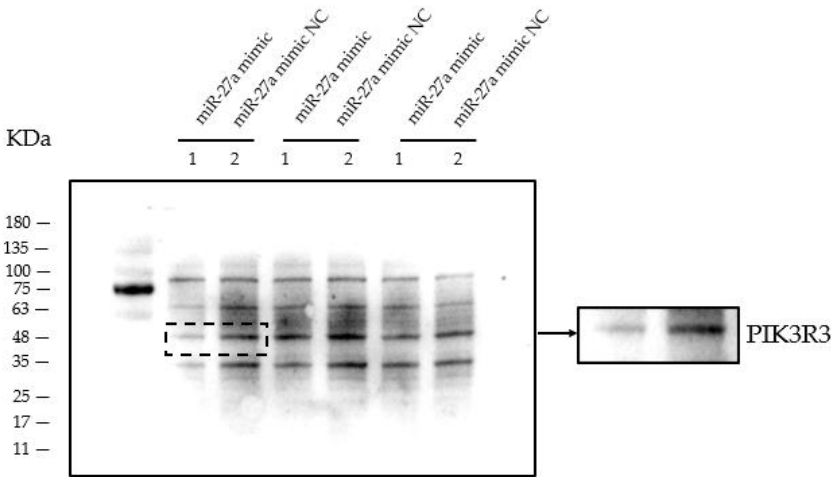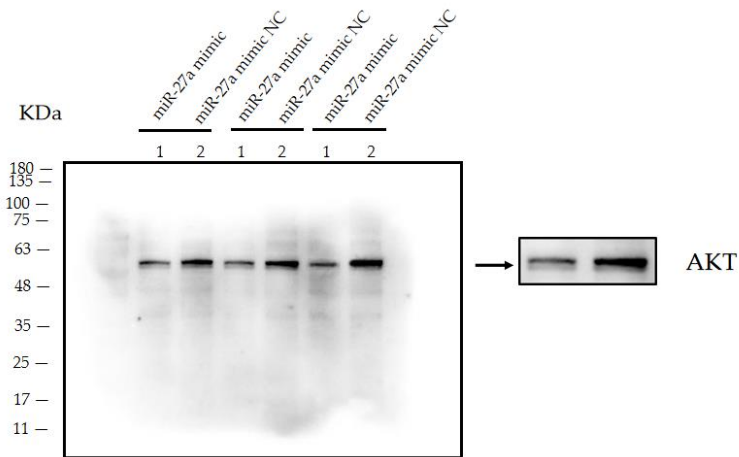

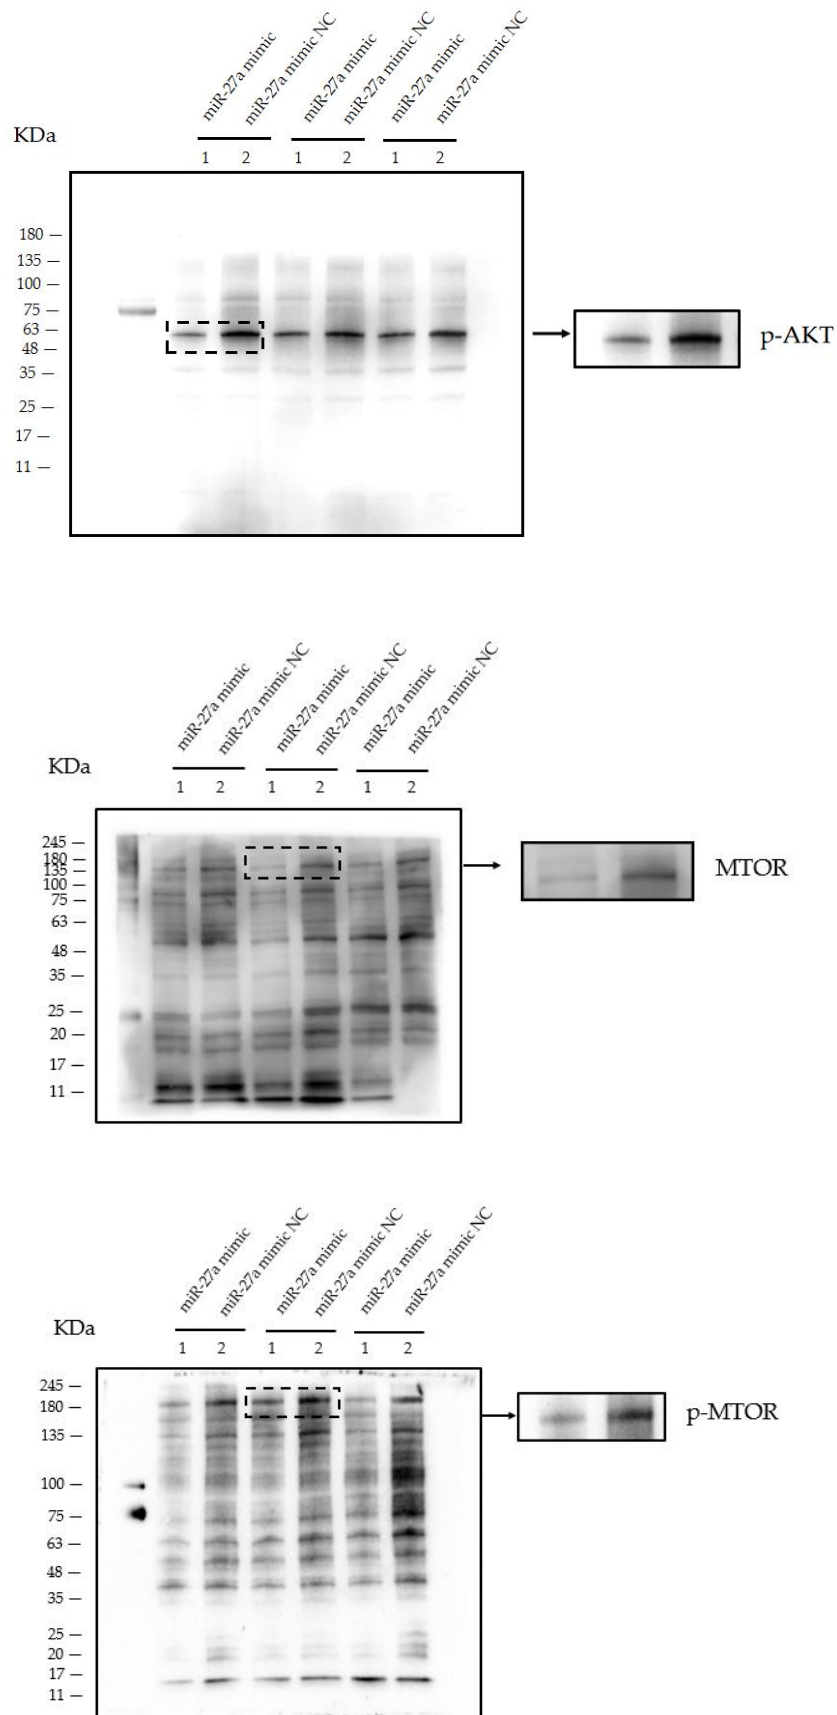

**Figure S2.** Expression changes of GAPDH, PIK3R3, AKT, p-AKT, MTOR and p-MTOR

proteins with a miR-27a mimic or a negative control (NC) in HFSCs.

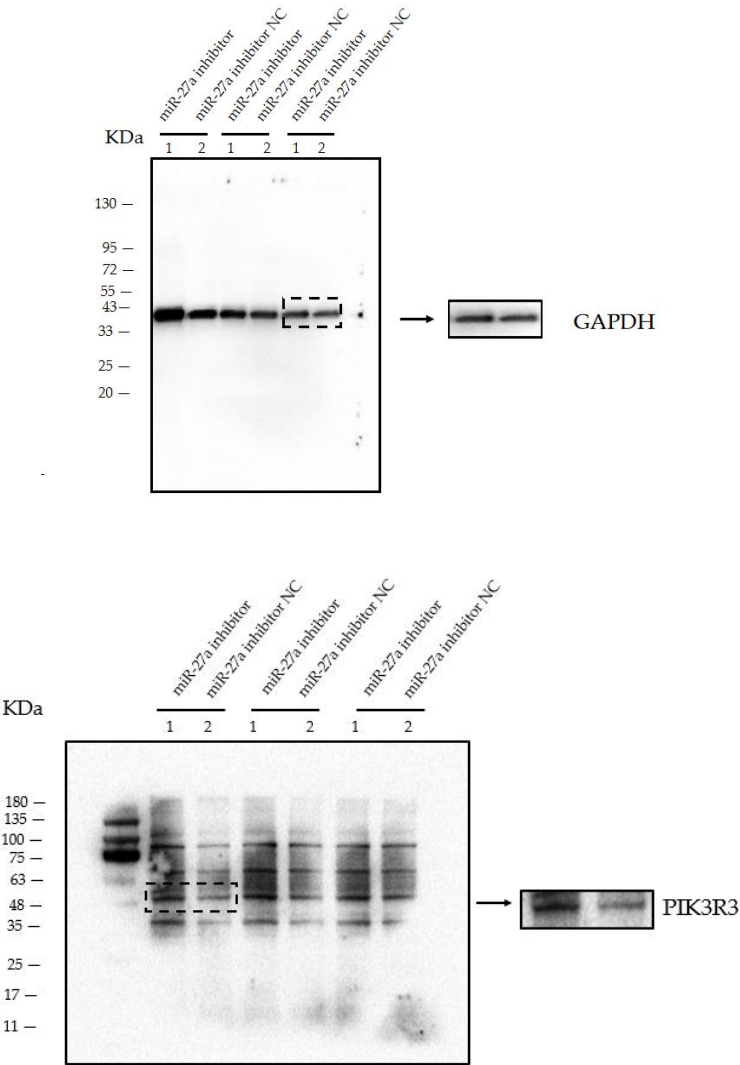

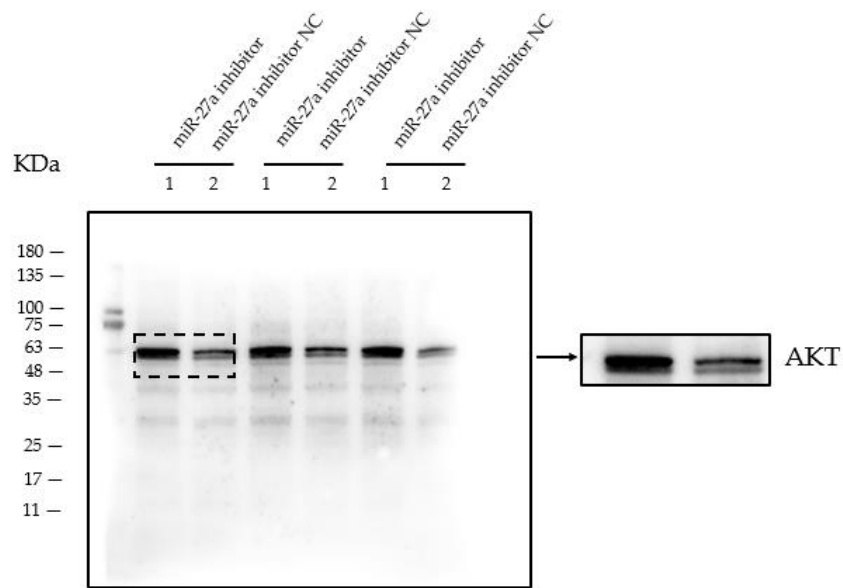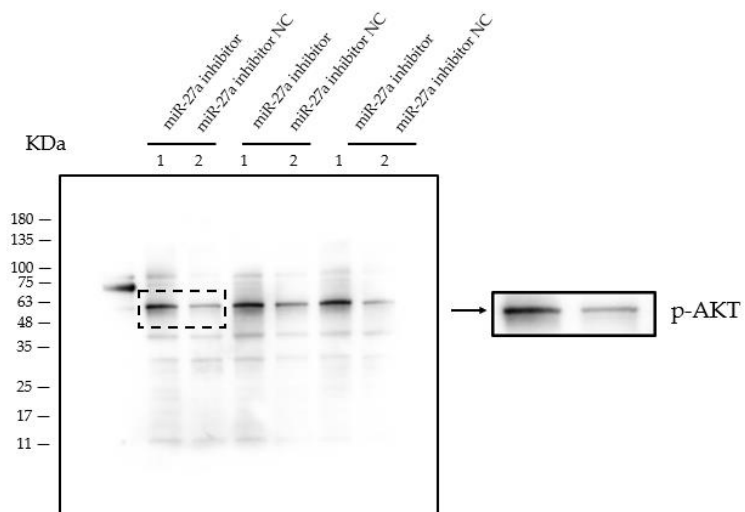

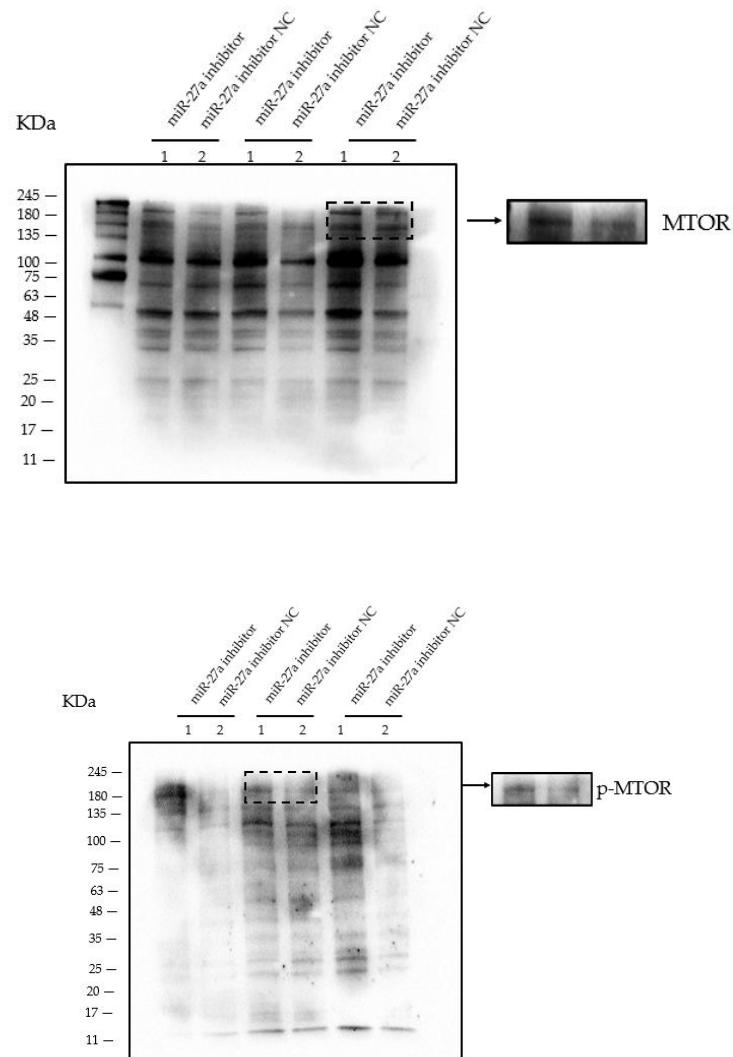

**Figure S3.** Expression changes of GAPDH, PIK3R3, AKT, p-AKT, MTOR and p-MTOR proteins with a miR-27a inhibitor or a negative control (NC) in HFSCs.
