# Supplementary material for: miR-27a Targeting PIK3R3 Regulates the Proliferation and Apoptosis of Sheep Hair Follicle Stem Cells
Source: Animals (Basel). 2022 Dec 29;13(1):141. doi: 10.3390/ani13010141 (PMC9817964; doi:10.3390/ani13010141)
Supplement: Supplementary file 1 [file animals-13-00141-s001.zip › Gray value.xlsx]

## Sheet: Sheet1
		GAPDH	PIK3R3	PIK3R3/GAPDH	AKT	AKT/GAPDH	p-AKT	p-AKT/GAPDH	MTOR	MTOR/GAPDH	p-MTOR	p-MTOR/GAPDH
si-PIK3R3	1	141827	95266	0.671706	110007	0.775642	66709	0.470355	67323	0.474684	48507	0.342015
si-PIK3R3 NC	2	145235	167932	1.15628	390601	2.68944	185144	1.27479	136600	0.940545	122449	0.843109
si-PIK3R3	3	149606	97555	0.652079	83476	0.557972	87866	0.587316	74064	0.49506	46024	0.307635
si-PIK3R3 NC	4	125996	184311	1.46283	480044	3.80999	166326	1.32009	136599	1.08415	80933	0.642346
si-PIK3R3	5	141595	92825	0.655567	118939	0.839994	72510	0.512094	68442	0.483365	50555	0.357039
si-PIK3R3 NC	6	160643	180321	1.1225	398394	2.48	154987	0.964791	191486	1.192	108343	0.674433
		GAPDH	PIK3R3	PIK3R3/GAPDH	AKT	AKT/GAPDH	p-AKT	p-AKT/GAPDH	MTOR	MTOR/GAPDH	p-MTOR	p-MTOR/GAPDH
miR-27a mimic	1	332877	103358	0.310499	53065	0.159413	54363	0.163313	40109	0.120492	198191	0.595388
miR-27a mimic NC	2	260063	195483	0.751676	78103	0.300323	139607	0.53682	79027	0.303876	477710	1.8369
miR-27a mimic	3	259150	96862	0.373768	46975	0.181266	68047	0.262578	45205	0.174436	206979	0.798684
miR-27a mimic NC	4	292748	154831	0.528888	90572	0.309386	103931	0.355019	96756	0.33051	548873	1.8749
miR-27a mimic	5	259561	87926	0.338749	50513	0.194609	50512	0.194606	37977	0.146312	169584	0.653349
miR-27a mimic NC	6	276709	140125	0.506398	123374	0.445862	94695	0.342219	141137	0.510056	311038	1.12406
		GAPDH	PIK3R3	PIK3R3/GAPDH	AKT	AKT/GAPDH	p-AKT	p-AKT/GAPDH	MTOR	MTOR/GAPDH	p-MTOR	p-MTOR/GAPDH
miR-27a inhibitor	1	423567	602331	1.42204	530568	1.25262	232637	0.549233	651464	1.53804	740696	1.74871
miR-27a inhibitor NC	2	470985	344198	0.730805	291256	0.618398	84578	0.179577	321475	0.682559	234170	0.497192
miR-27a inhibitor	3	416650	693013	1.6633	527764	1.26668	234285	0.562306	624082	1.49786	522423	1.25387
miR-27a inhibitor NC	4	449875	357183	0.793961	307918	0.684452	131149	0.291523	304756	0.677424	275975	0.613448
miR-27a inhibitor	5	427380	611529	1.43088	633291	1.4818	246718	0.57728	761627	1.78208	547412	1.28086
miR-27a inhibitor NC	6	405773	320714	0.790378	264414	0.65163	68803	0.16956	281146	0.692865	211047	0.520111
